# Supplementary material
Source: PubMed Central journal article supplement (PMC4254180)
Supplement: NIHMS632406-supplement.pdf [file NIHMS632406-supplement.pdf]

## Supplementary data

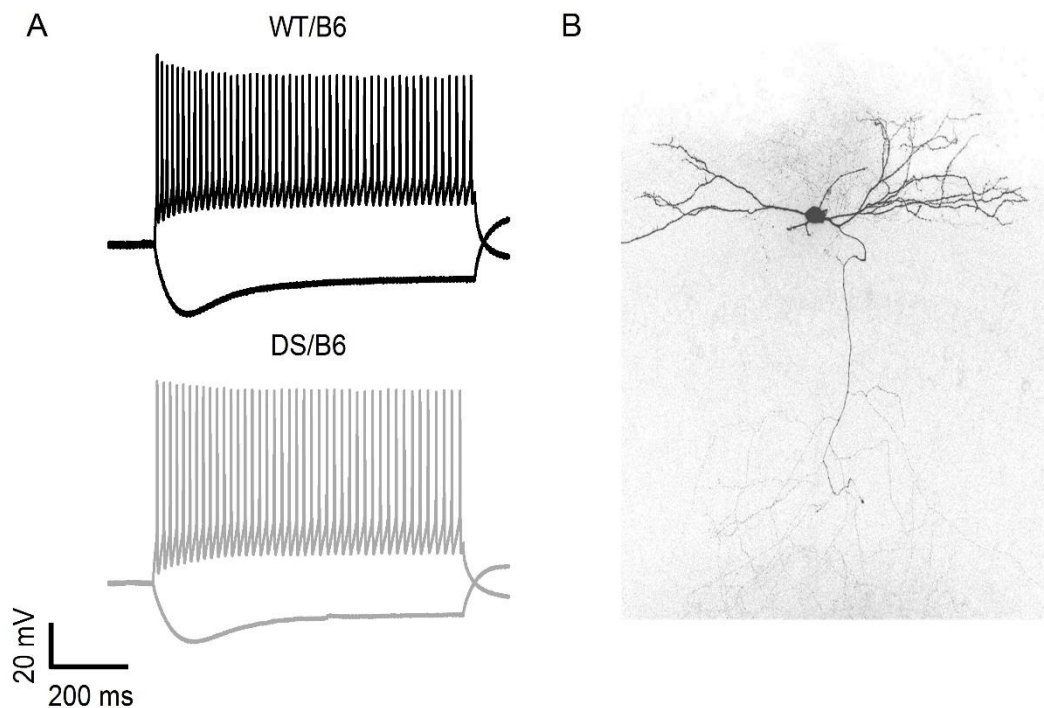

### Supplementary Fig. 1: Firing properties of *SO* CA1 interneurons.

A. Firing pattern of *SO* CA1 interneuron in WT/B6 (black) and DS/B6 (gray) in response to hyperpolarizing (-100 pA) and depolarizing (280 pA) current injection. B. Contrast enhanced biocytin filled *SO* interneuron.

**Supplementary Table 1: Electrophysiological parameters of CA1 *SO* interneurons**

|               | <b>IR (M<math>\Omega</math>)</b> | <b>V<sub>rest</sub> (mV)</b> | <b>C<sub>m</sub> (pF)</b> | <b>Holding current (pA)</b> |
|---------------|----------------------------------|------------------------------|---------------------------|-----------------------------|
| <b>WT/129</b> | 354.02 $\pm$ 18.08               | -56.3 $\pm$ 1.4              | 20.8 $\pm$ 0.9            | -29.7 $\pm$ 0.89            |
| <b>DS/129</b> | 338.67 $\pm$ 25.39               | -58.6 $\pm$ 1.2              | 22.2 $\pm$ 2.4            | -9.7 $\pm$ 9.5              |
| <b>WT/B6</b>  | 380.54 $\pm$ 9.97                | -53.7 $\pm$ 2                | 21 $\pm$ 1                | -31.6 $\pm$ 6.2             |
| <b>DS/B6</b>  | 382.47 $\pm$ 20.10               | -56.4 $\pm$ 1.3              | 19.6 $\pm$ 1              | -20.7 $\pm$ 10              |
